# Supplementary material for: Secretoneurin A regulates neurogenic and inflammatory transcriptional networks in goldfish (Carassius auratus) radial glia
Source: PubMed Central journal article supplement (PMC5668316; doi:10.1038/s41598-017-14930-8), 2017-11-02
Supplement: 41598_2017_14930_MOESM1_ESM.pdf [file 41598_2017_14930_MOESM1_ESM.pdf]

**Secretoneurin A regulates neurogenic and inflammatory transcriptional networks in goldfish (*Carassius auratus*) radial glia**

Dillon F. Da Fonte, Christopher J. Martyniuk, Lei Xing, Adrian Pelin, Nicolas Corradi, Wei Hu, Vance L. Trudeau

Supplemental File S1

|                | Primer Sequence (Forward) | Primer Sequence (Reverse) |
|----------------|---------------------------|---------------------------|
| <i>smad6b</i>  | CGGCGAATAAAATCCACAGA      | CTGAACGGAACCAGGAACA       |
| <i>grapa</i>   | GGCTCACCCCTTTCCTCTCTT     | CCCTTCCTGTTCACCAACTC      |
| <i>fgf4</i>    | GGGCTACGCATTCCATTCT       | TAGGTGTTTTGGGGGTCTTG      |
| <i>nab1a</i>   | CGAACACAGCCTATCTCCATC     | TAGTCGCTCTACGCACTCCA      |
| <i>baiap2b</i> | TCCGTCCATTTCTCTCCAAC      | GACCTTCTCCAACACCCTACCT    |
